# Supplementary material
Source: Springer Nature journal article supplement (https://www.springermedizin.de/resource/supplementary/12885_2013_4394_MOESM2_ESM.pdf/9466188)

**A****CD44-PE**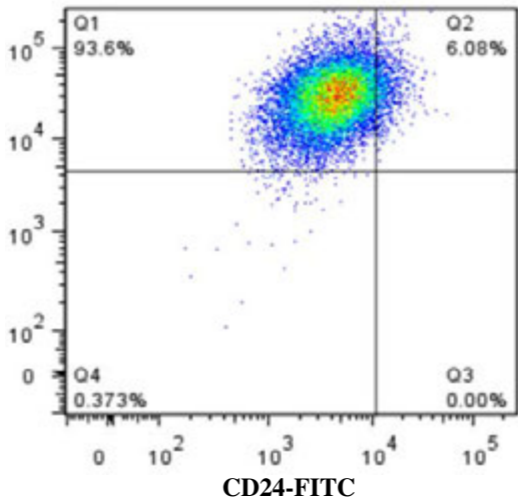**B****A253 Cells****Fold Changes (log2) in Gene Expression**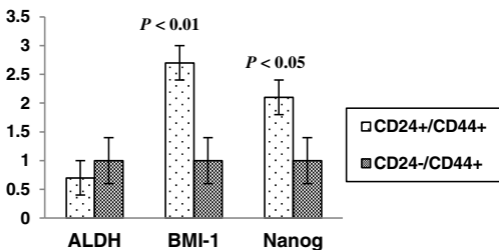**C****KCCT873 Cells****Fold Changes (log2) in Gene Expression**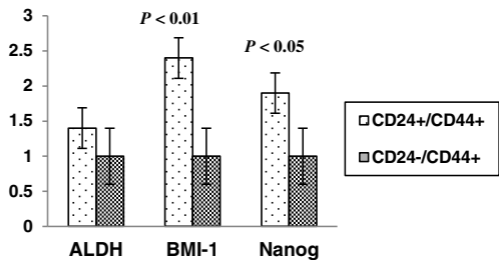

Supplement: MOESM2 [file 9466188]
